# Supplementary material for: Associations Between Chronotype, Genetic Susceptibility and Risk of Colorectal Cancer in UK Biobank
Source: Springer Nature journal article supplement (doi:10.1007/s44197-025-00399-6), 2025-04-10
Supplement: MOESM5 [file 44197_2025_399_MOESM5_ESM.pdf]

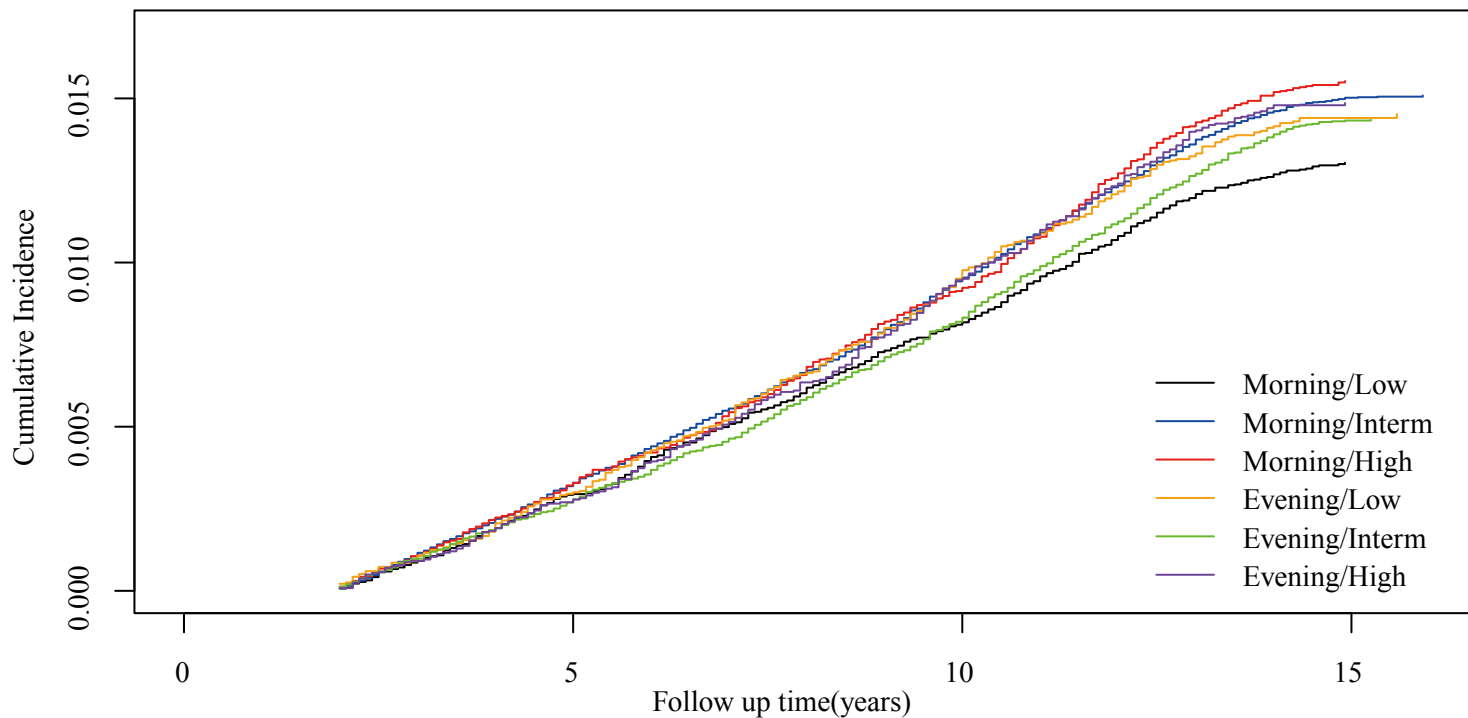

Figure S1. Cumulative Incidence of Colorectal Cancer Across Different Chronotype and PRS Groups
